# Supplementary material
Source: publisher site journal article supplement (https://www.dovepress.com/article/327110)
Supplement: Supplementary file 1 [file get_supplementary_file.php]

**Supplementary Table 1** List of the anatomical brain regions included in automated anatomical labeling atlas

| Labels | Regions | Abbreviation |
| --- | --- | --- |
| 1 | Left precental gyrus | PreCG.L |
| 2 | Right precental gyrus | PreCG.R |
| 3 | Left superior frontal gyrus, dorsolateral | SFGdor.L |
| 4 | Right superior frontal gyrus, dorsolateral | SFGdor.R |
| 5 | Left superior frontal gyrus, orbital part | ORBsup.L |
| 6 | Right superior frontal gyrus, orbital part | ORBsup.R |
| 7 | Left middle frontal gyrus | MFG.L |
| 8 | Right middle frontal gyrus | MFG.R |
| 9 | Left middle frontal gyrus, orbital part | ORBmid.L |
| 10 | Right middle frontal gyrus, orbital part | ORBmid.R |
| 11 | Left inferior frontal gyrus, opercular part | IFGoperc.L |
| 12 | Right inferior frontal gyrus, opercular part | IFGoperc.R |
| 13 | Left inferior frontal gyrus, triangular part | IFGtriang.L |
| 14 | Right inferior frontal gyrus, triangular part | IFGtriang.R |
| 15 | Left inferior frontal gyrus, orbital part | ORBinf.L |
| 16 | Right inferior frontal gyrus, orbital part | ORBinf.R |
| 17 | Left rolandic operculum | ROL.L |
| 18 | Right rolandic operculum | ROL.R |
| 19 | Left supplementary motor area | SMA.L |
| 20 | Right supplementary motor area | SMA.R |
| 21 | Left olfactory cortex | OLF.L |
| 22 | Right olfactory cortex | OLF.R |
| 23 | Left superior frontal gyrus, medial | SFGmed.L |
| 24 | Right superior frontal gyrus, medial | SFGmed.R |
| 25 | Left superior frontal gyrus, medial orbital | ORBsupmed.L |
| 26 | Right superior frontal gyrus, medial orbital | ORBsupmed.R |
| 27 | Left rectus gyrus | REC.L |
| 28 | Right rectus gyrus | REC.R |
| 29 | Left insula | INS.L |
| 30 | Right insula | INS.R |
| 31 | Left anterior cingulate and paracingulate gyri | ACG.L |
| 32 | Right anterior cingulate and paracingulate gyri | ACG.R |
| 33 | Left median cingulate and paracingulate gyri | DCG.L |
| 34 | Right median cingulate and paracingulate gyri | DCG.R |
| 35 | Left posterior cingulate gyrus | PCG.L |
| 36 | Right posterior cingulate gyrus | PCG.R |
| 37 | Left hippocampus | HIP.L |
| 38 | Right hippocampus | HIP.R |
| 39 | Left parahippocampal gyrus | PHG.L |
| 40 | Right parahippocampal gyrus | PHG.R |
| 41 | Left amygdala | AMYG.L |
| 42 | Right amygdala | AMYG.R |
| 43 | Left calcarine fissure and surrounding cortex | CAL.L |
| 44 | Right calcarine fissure and surrounding cortex | CAL.R |
| 45 | Left cuneus | CUN.L |
| 46 | Right cuneus | CUN.R |
| 47 | Left lingual gyrus | LING.L |
| 48 | Right lingual gyrus | LING.R |
| 49 | Left superior occipital gyrus | SOG.L |
| 50 | Right superior occipital gyrus | SOG.R |
| 51 | Left middle occipital gyrus | MOG.L |
| 52 | Right middle occipital gyrus | MOG.R |
| 53 | Left inferior occipital gyrus | IOG.L |
| 54 | Right inferior occipital gyrus | IOG.R |
| 55 | Left fusiform gyrus | FFG.L |
| 56 | Right fusiform gyrus | FFG.R |
| 57 | Left postcentral gyrus | PoCG.L |
| 58 | Right postcentral gyrus | PoCG.R |
| 59 | Left superior parietal gyrus | SPG.L |
| 60 | Right superior parietal gyrus | SPG.R |
| 61 | Left inferior parietal lobule | IPL.L |
| 62 | Right inferior parietal lobule | IPL.R |
| 63 | Left supramarginal gyrus | SMG.L |
| 64 | Right supramarginal gyrus | SMG.R |
| 65 | Left angular gyrus | ANG.L |
| 66 | Right angular gyrus | ANG.R |
| 67 | Left precuneus | PCUN.L |
| 68 | Right precuneus | PCUN.R |
| 69 | Left paracentral lobule | PCL.L |
| 70 | Right paracentral lobule | PCL.R |
| 71 | Left caudate nucleus | CAU.L |
| 72 | Right caudate nucleus | CAU.R |
| 73 | Left lenticular nucleus, putamen | PUT.L |
| 74 | Right lenticular nucleus, putamen | PUT.R |
| 75 | Left lenticular nucleus, pallidum | PAL.L |
| 76 | Right lenticular nucleus, pallidum | PAL.R |
| 77 | Left thalamus | THA.L |
| 78 | Right thalamus | THA.R |
| 79 | Left heschl gyrus | HES.L |
| 80 | Right heschl gyrus | HES.R |
| 81 | Left superior temporal gyrus | STG.L |
| 82 | Right superior temporal gyrus | STG.R |
| 83 | Left temporal pole: superior temporal gyrus | TPOsup.L |
| 84 | Right temporal pole: superior temporal gyrus | TPOsup.R |
| 85 | Left middle temporal gyrus | MTG.L |
| 86 | Right middle temporal gyrus | MTG.R |
| 87 | Left temporal pole: middle temporal gyrus | TPOmid.L |
| 88 | Right temporal pole: middle temporal gyrus | TPOmid.R |
| 89 | Left inferior temporal gyrus | ITG.L |
| 90 | Right inferior temporal gyrus | ITG.R |
